# Supplementary material
Source: PubMed Central journal article supplement (PMC181989)
Supplement: jamia_M1203_1.pdf [file jamia_M1203_1.pdf]

Appendix A. Focus and Judgment analysis

| Source Terminology | Nursing Diagnosis                            | Focus Classification       | Judgment Classification |
|--------------------|----------------------------------------------|----------------------------|-------------------------|
| HHCC               | Activities of daily living (ADLs) alteration | Activities of daily living | Alteration              |
| HHCC               | Activity alteration                          | Activity                   | Alteration              |
| HHCC               | Activity intolerance                         | Activity                   | Intolerance             |
| HHCC               | Activity intolerance risk                    | Activity                   | Intolerance risk        |
| HHCC               | Acute pain                                   | Pain                       |                         |
| HHCC               | Adjustment impairment                        | Adjustment                 | Impairment              |
| HHCC               | Airway clearance impairment                  | Airway clearance           | Impairment              |
| HHCC               | Anticipatory grieving                        | Anticipatory grieving      |                         |
| HHCC               | Anxiety                                      | Anxiety                    |                         |
| HHCC               | Aspiration risk                              | Aspiration                 | Risk                    |
| HHCC               | Auditory alteration                          | Auditory function          | Alteration              |
| HHCC               | Bathing/hygiene deficit                      | Bathing/hygiene            | Deficit                 |
| HHCC               | Blood pressure alteration                    | Blood pressure             | Alteration              |
| HHCC               | Body image disturbance                       | Body image                 | Disturbance             |
| HHCC               | Body nutrition deficit                       | Body nutrition             | Deficit                 |
| HHCC               | Body nutrition deficit risk                  | Body nutrition             | Deficit risk            |
| HHCC               | Body nutrition excess                        | Body nutrition             | Excess                  |
| HHCC               | Body nutrition excess risk                   | Body nutrition             | Excess risk             |
| HHCC               | Bowel elimination alteration                 | Bowel elimination          | Alteration              |
| HHCC               | Bowel incontinence                           | Bowel incontinence         |                         |
| HHCC               | Breastfeeding impairment                     | Breastfeeding              | Impairment              |
| HHCC               | Breathing pattern impairment                 | Breathing pattern          | Impairment              |
| HHCC               | Cardiac output alteration                    | Cardiac output             | Alteration              |
| HHCC               | Cardiovascular alteration                    | Cardiovascular function    | Alteration              |
| HHCC               | Cerebral alteration                          | Cerebral function          | Alteration              |
| HHCC               | Chronic low self-esteem disturbance          | Self-esteem                | Disturbance             |
| HHCC               | Chronic pain                                 | Pain                       |                         |
| HHCC               | Colonic constipation                         | Colonic constipation       |                         |
| HHCC               | Comfort alteration                           | Comfort                    | Alteration              |
| HHCC               | Communication impairment                     | Communication              | Impairment              |
| HHCC               | Compromised family coping                    | Coping                     | Compromised             |
| HHCC               | Decisional conflict                          | Decision                   | Conflict                |
| HHCC               | Defensive coping                             | Defensive coping           |                         |
| HHCC               | Denial                                       | Denial                     |                         |
| HHCC               | Diarrhea                                     | Diarrhea                   |                         |
| HHCC               | Disabled family coping                       | Coping                     | Disabled                |
| HHCC               | Disuse syndrome                              | Disuse syndrome            |                         |
| HHCC               | Diversional activity deficit                 | Diversional activity       | Deficit                 |
| HHCC               | Dressing/grooming deficit                    | Dressing/grooming          | Deficit                 |
| HHCC               | Dying process                                | Dying process              |                         |
| HHCC               | Dysfunctional grieving                       | Grieving                   | Dysfunctional           |
| HHCC               | Dysreflexia                                  | Dysreflexia                |                         |
| HHCC               | Endocrine alteration                         | Endocrine                  | Alteration              |
| HHCC               | Family coping impairment                     | Coping                     | Impairment              |
| HHCC               | Family processes alteration                  | Family processes           | Alteration              |
| HHCC               | Fatigue                                      | Fatigue                    |                         |
| HHCC               | Fear                                         | Fear                       |                         |
| HHCC               | Fecal impaction                              | Fecal impaction            |                         |
| HHCC               | Feeding deficit                              | Feeding                    | Deficit                 |
| HHCC               | Fluid volume alteration                      | Fluid volume               | Alteration              |

|      |                                                            |                                     |               |
|------|------------------------------------------------------------|-------------------------------------|---------------|
| HHCC | Fluid volume deficit                                       | Fluid volume                        | Deficit       |
| HHCC | Fluid volume deficit risk                                  | Fluid volume                        | Deficit risk  |
| HHCC | Fluid volume excess                                        | Fluid volume                        | Excess        |
| HHCC | Fluid volume excess risk                                   | Fluid volume                        | Excess risk   |
| HHCC | Functional urinary incontinence                            | Functional urinary incontinence     |               |
| HHCC | Gas exchange impairment                                    | Gas exchange                        | Impairment    |
| HHCC | Gastrointestinal alteration                                | Gastrointestinal function           | Alteration    |
| HHCC | Grieving                                                   | Grieving                            |               |
| HHCC | Growth & development alteration                            | Growth & development                | Alteration    |
| HHCC | Gustatory alteration                                       | Gustatory function                  | Alteration    |
| HHCC | Health maintenance alteration                              | Health maintenance                  | Alteration    |
| HHCC | Health-seeking behavior alteration                         | Health-seeking behavior             | Alteration    |
| HHCC | Home maintenance alteration                                | Home maintenance                    | Alteration    |
| HHCC | Hopelessness                                               | Hopelessness                        |               |
| HHCC | Hyperthermia                                               | Hyperthermia                        |               |
| HHCC | Hypothermia                                                | Hypothermia                         |               |
| HHCC | Immunologic alteration                                     | Immunologic function                | Alteration    |
| HHCC | Individual coping impairment                               | Coping                              | Impairment    |
| HHCC | Infection risk                                             | Infection                           | Risk          |
| HHCC | Infection unspecified                                      | Unspecified infection               |               |
| HHCC | Injury risk                                                | Injury                              | Risk          |
| HHCC | Instrumental activities of daily living (IADLs) alteration | IADLs                               | Alteration    |
| HHCC | Kinesthetic alteration                                     | Kinesthetic function                | Alteration    |
| HHCC | Knowledge deficit                                          | Knowledge                           | Deficit       |
| HHCC | Knowledge deficit of diagnostic test                       | Knowledge of diagnostic test        | Deficit       |
| HHCC | Knowledge deficit of dietary regimen                       | Knowledge of dietary regimen        | Deficit       |
| HHCC | Knowledge deficit of disease process                       | Knowledge of disease process        | Deficit       |
| HHCC | Knowledge deficit of fluid volume                          | Knowledge of fluid volume           | Deficit       |
| HHCC | Knowledge deficit of medication regimen                    | Knowledge of medication regimen     | Deficit       |
| HHCC | Knowledge deficit of safety precautions                    | Knowledge of safety precautions     | Deficit       |
| HHCC | Knowledge deficit of therapeutic regimen                   | Knowledge of therapeutic regimen    | Deficit       |
| HHCC | Meaningfulness alteration                                  | Meaningfulness                      | Alteration    |
| HHCC | Medication risk                                            | Medication                          | Risk          |
| HHCC | Musculoskeletal alteration                                 | Musculoskeletal function            | Alteration    |
| HHCC | Noncompliance                                              | Compliance                          | Noncompliance |
| HHCC | Noncompliance with diagnostic test                         | Compliance with diagnostic test     | Noncompliance |
| HHCC | Noncompliance with dietary regimen                         | Compliance with dietary regimen     | Noncompliance |
| HHCC | Noncompliance with fluid volume                            | Compliance with fluid volume        | Noncompliance |
| HHCC | Noncompliance with medication regimen                      | Compliance with medication regimen  | Noncompliance |
| HHCC | Noncompliance with safety precautions                      | Compliance with safety precautions  | Noncompliance |
| HHCC | Noncompliance with therapeutic regimen                     | Compliance with therapeutic regimen | Noncompliance |
| HHCC | Nutrition alteration                                       | Nutrition                           | Alteration    |
| HHCC | Olfactory alteration                                       | Olfactory function                  | Alteration    |
| HHCC | Oral mucous membranes impairment                           | Mucous membranes                    | Impairment    |
| HHCC | Parental role conflict                                     | Parental role                       | Conflict      |
| HHCC | Parenting alteration                                       | Parenting                           | Alteration    |
| HHCC | Perceived constipation                                     | Perceived constipation              |               |
| HHCC | Peripheral alteration                                      | Peripheral vasculization            | Alteration    |
| HHCC | Personal identity disturbance                              | Personal identity                   | Disturbance   |
| HHCC | Physical mobility impairment                               | Physical mobility                   | Impairment    |

|       |                                             |                             |                      |
|-------|---------------------------------------------|-----------------------------|----------------------|
| HHCC  | Physical regulation alteration              | Physical regulation         | Alteration           |
| HHCC  | Poisoning risk                              | Poisoning                   | Risk                 |
| HHCC  | Polypharmacy                                | Polypharmacy                |                      |
| HHCC  | Post-trauma response                        | Post-trauma response        |                      |
| HHCC  | Powerlessness                               | Powerlessness               |                      |
| HHCC  | Protection alteration                       | Protection                  | Alteration           |
| HHCC  | Rape trauma syndrome                        | Rape trauma syndrome        |                      |
| HHCC  | Reflex urinary incontinence                 | Reflex urinary incontinence |                      |
| HHCC  | Renal alteration                            | Renal function              | Alteration           |
| HHCC  | Respiration alteration                      | Respiration                 | Alteration           |
| HHCC  | Role performance alteration                 | Role performance            | Alteration           |
| HHCC  | Self-care deficit                           | Self-care                   | Deficit              |
| HHCC  | Self-concept alteration                     | Self-concept                | Alteration           |
| HHCC  | Sensory perceptual alteration               | Sensory perceptual function | Alteration           |
| HHCC  | Sexual dysfunction                          | Sexual function             | Dysfunction          |
| HHCC  | Sexuality patterns alteration               | Sexuality patterns          | Alteration           |
| HHCC  | Situational self-esteem disturbance         | Situational self-esteem     | Disturbance          |
| HHCC  | Skin incision                               | Skin                        | Incision             |
| HHCC  | Skin integrity impairment                   | Skin integrity              | Impairment           |
| HHCC  | Skin integrity impairment risk              | Skin integrity              | Impairment risk      |
| HHCC  | Sleep pattern disturbance                   | Sleep pattern               | Disturbance          |
| HHCC  | Social interaction alteration               | Social interaction          | Alteration           |
| HHCC  | Social isolation                            | Social isolation            |                      |
| HHCC  | Socialization alteration                    | Socialization               | Alteration           |
| HHCC  | Spiritual distress                          | Spiritual state             | Distress             |
| HHCC  | Spiritual state alteration                  | Spiritual state             | Alteration           |
| HHCC  | Stress urinary incontinence                 | Stress urinary incontinence |                      |
| HHCC  | Suffocation risk                            | Suffocation                 | Risk                 |
| HHCC  | Swallowing impairment                       | Swallowing                  | Impairment           |
| HHCC  | Tactile alteration                          | Tactile function            | Alteration           |
| HHCC  | Thermoregulation impairment                 | Thermoregulation            | Impairment           |
| HHCC  | Thought processes alteration                | Thought processes           | Alteration           |
| HHCC  | Tissue integrity alteration                 | Tissue integrity            | Alteration           |
| HHCC  | Tissue perfusion alteration                 | Tissue perfusion            | Alteration           |
| HHCC  | Toileting deficit                           | Toileting                   | Deficit              |
| HHCC  | Total urinary incontinence                  | Total urinary incontinence  |                      |
| HHCC  | Trauma risk                                 | Trauma                      | Risk                 |
| HHCC  | Unilateral neglect                          | Unilateral neglect          |                      |
| HHCC  | Unspecified constipation                    | Unspecified constipation    |                      |
| HHCC  | Unspecified pain                            | Unspecified pain            |                      |
| HHCC  | Urge urinary incontinence                   | Urge urinary incontinence   |                      |
| HHCC  | Urinary elimination alteration              | Urinary elimination         | Alteration           |
| HHCC  | Urinary retention                           | Urinary retention           |                      |
| HHCC  | Verbal impairment                           | Verbal function             | Impairment           |
| HHCC  | Violence risk                               | Violence                    | Risk                 |
| HHCC  | Visual alteration                           | Vision                      | Alteration           |
| OMAHA | Abused child/adult: actual                  | Abused child/adult          | Actual               |
| OMAHA | Abused child/adult: health promotion        | Abused child/adult          | Health promotion     |
| OMAHA | Abused child/adult: potential               | Abused child/adult          | Potential            |
| OMAHA | Antepartum/postpartum: health promotion     | Antepartum/postpartum       | Health promotion     |
| OMAHA | Antepartum/postpartum: impairment           | Antepartum/postpartum       | Impairment           |
| OMAHA | Antepartum/postpartum: potential impairment | Antepartum/postpartum       | Potential impairment |
| OMAHA | Bowel function: health promotion            | Bowel function              | Health promotion     |
| OMAHA | Bowel function: impairment                  | Bowel function              | Impairment           |

|       |                                                              |                                        |                      |
|-------|--------------------------------------------------------------|----------------------------------------|----------------------|
| OMAHA | Bowel function: potential impairment                         | Bowel function                         | Potential impairment |
| OMAHA | Caretaking/parenting: health promotion                       | Caretaking/parenting                   | Health promotion     |
| OMAHA | Caretaking/parenting: impairment                             | Caretaking/parenting                   | Impairment           |
| OMAHA | Caretaking/parenting: potential impairment                   | Caretaking/parenting                   | Potential impairment |
| OMAHA | Circulation: health promotion                                | Circulation                            | Health promotion     |
| OMAHA | Circulation: impairment                                      | Circulation                            | Impairment           |
| OMAHA | Circulation: potential impairment                            | Circulation                            | Potential impairment |
| OMAHA | Cognition: health promotion                                  | Cognition                              | Health promotion     |
| OMAHA | Cognition: impairment                                        | Cognition                              | Impairment           |
| OMAHA | Cognition: potential impairment                              | Cognition                              | Potential impairment |
| OMAHA | Communication with community resources: health promotion     | Communication with community resources | Health promotion     |
| OMAHA | Communication with community resources: impairment           | Communication with community resources | Impairment           |
| OMAHA | Communication with community resources: potential impairment | Communication with community resources | Potential impairment |
| OMAHA | Consciousness: health promotion                              | Consciousness                          | Health promotion     |
| OMAHA | Consciousness: impairment                                    | Consciousness                          | Impairment           |
| OMAHA | Consciousness: potential impairment                          | Consciousness                          | Potential impairment |
| OMAHA | Dentition: health promotion                                  | Dentition                              | Health promotion     |
| OMAHA | Dentition: impairment                                        | Dentition                              | Impairment           |
| OMAHA | Dentition: potential impairment                              | Dentition                              | Potential impairment |
| OMAHA | Digestion-hydration: health promotion                        | Digestion-hydration                    | Health promotion     |
| OMAHA | Digestion-hydration: impairment                              | Digestion-hydration                    | Impairment           |
| OMAHA | Digestion-hydration: potential impairment                    | Digestion-hydration                    | Potential impairment |
| OMAHA | Emotional stability: health promotion                        | Emotional stability                    | Health promotion     |
| OMAHA | Emotional stability: impairment                              | Emotional stability                    | Impairment           |
| OMAHA | Emotional stability: potential impairment                    | Emotional stability                    | Potential impairment |
| OMAHA | Family planning: health promotion                            | Family planning                        | Health promotion     |
| OMAHA | Family planning: impairment                                  | Family planning                        | Impairment           |
| OMAHA | Family planning: potential impairment                        | Family planning                        | Potential impairment |
| OMAHA | Genito-urinary function: health promotion                    | Genito-urinary function                | Health promotion     |
| OMAHA | Genito-urinary function: impairment                          | Genito-urinary function                | Impairment           |
| OMAHA | Genito-urinary function: potential impairment                | Genito-urinary function                | Potential impairment |
| OMAHA | Grief: health promotion                                      | Grief                                  | Health promotion     |
| OMAHA | Grief: impairment                                            | Grief                                  | Impairment           |
| OMAHA | Grief: potential impairment                                  | Grief                                  | Potential impairment |
| OMAHA | Growth and development: health promotion                     | Growth and development                 | Health promotion     |
| OMAHA | Growth and development: impairment                           | Growth and development                 | Impairment           |
| OMAHA | Growth and development: potential impairment                 | Growth and development                 | Potential impairment |
| OMAHA | Health care supervision: health promotion                    | Health care supervision                | Health promotion     |

|       |                                                  |                                 |                      |
|-------|--------------------------------------------------|---------------------------------|----------------------|
| OMAHA | Health care supervision: impairment              | Health care supervision         | Impairment           |
| OMAHA | Health care supervision: potential impairment    | Health care supervision         | Potential impairment |
| OMAHA | Hearing: health promotion                        | Hearing                         | Health promotion     |
| OMAHA | Hearing: impairment                              | Hearing                         | Impairment           |
| OMAHA | Hearing: potential impairment                    | Hearing                         | Potential impairment |
| OMAHA | Human sexuality: health promotion                | Human sexuality                 | Health promotion     |
| OMAHA | Human sexuality: impairment                      | Human sexuality                 | Impairment           |
| OMAHA | Human sexuality: potential impairment            | Human sexuality                 | Potential impairment |
| OMAHA | Income: deficit                                  | Income                          | Deficit              |
| OMAHA | Income: health promotion                         | Income                          | Health promotion     |
| OMAHA | Income: potential deficit                        | Income                          | Potential deficit    |
| OMAHA | Integument: health promotion                     | Integument                      | Health promotion     |
| OMAHA | Integument: impairment                           | Integument                      | Impairment           |
| OMAHA | Integument: potential impairment                 | Integument                      | Potential impairment |
| OMAHA | Interpersonal relationship: health promotion     | Interpersonal relationship      | Health promotion     |
| OMAHA | Interpersonal relationship: impairment           | Interpersonal relationship      | Impairment           |
| OMAHA | Interpersonal relationship: potential impairment | Interpersonal relationship      | Potential impairment |
| OMAHA | Neglected child/adult: actual                    | Neglected child/adult           | Actual               |
| OMAHA | Neglected child/adult: health promotion          | Neglected child/adult           | Health promotion     |
| OMAHA | Neglected child/adult: potential                 | Neglected child/adult           | Potential            |
| OMAHA | Neighborhood/workplace safety: deficit           | Neighborhood/workplace safety   | Deficit              |
| OMAHA | Neighborhood/workplace safety: health promotion  | Neighborhood/workplace safety   | Health promotion     |
| OMAHA | Neighborhood/workplace safety: potential deficit | Neighborhood/workplace safety   | Potential deficit    |
| OMAHA | Neuro-musculo-skeletal health promotion          | Neuro-musculo-skeletal function | Health promotion     |
| OMAHA | Neuro-musculo-skeletal impairment                | Neuro-musculo-skeletal function | Impairment           |
| OMAHA | Neuro-musculo-skeletal potential impairment      | Neuro-musculo-skeletal function | Potential impairment |
| OMAHA | Nutrition: health promotion                      | Nutrition                       | Health promotion     |
| OMAHA | Nutrition: impairment                            | Nutrition                       | Impairment           |
| OMAHA | Nutrition: potential impairment                  | Nutrition                       | Potential impairment |
| OMAHA | Pain: actual                                     | Pain                            | Actual               |
| OMAHA | Pain: health promotion                           | Pain                            | Health promotion     |
| OMAHA | Pain: potential                                  | Pain                            | Potential            |
| OMAHA | Personal hygiene: health promotion               | Personal hygiene                | Health promotion     |
| OMAHA | Personal hygiene: impairment                     | Personal hygiene                | Impairment           |
| OMAHA | Personal hygiene: potential impairment           | Personal hygiene                | Potential impairment |
| OMAHA | Physical activity: health promotion              | Physical activity               | Health promotion     |
| OMAHA | Physical activity: impairment                    | Physical activity               | Impairment           |
| OMAHA | Physical activity: potential impairment          | Physical activity               | Potential impairment |
| OMAHA | Prescribed medication regimen: health promotion  | Prescribed medication regimen   | Health promotion     |
| OMAHA | Prescribed medication regimen: impairment        | Prescribed medication regimen   | Impairment           |

|       |                                                     |                               |                      |
|-------|-----------------------------------------------------|-------------------------------|----------------------|
| OMAHA | Prescribed medication regimen: potential impairment | Prescribed medication regimen | Potential impairment |
| OMAHA | Residence: deficit                                  | Residence                     | Deficit              |
| OMAHA | Residence: health promotion                         | Residence                     | Health promotion     |
| OMAHA | Residence: potential deficit                        | Residence                     | Potential deficit    |
| OMAHA | Respiration: health promotion                       | Respiration                   | Health promotion     |
| OMAHA | Respiration: impairment                             | Respiration                   | Impairment           |
| OMAHA | Respiration: potential impairment                   | Respiration                   | Potential impairment |
| OMAHA | Role change: health promotion                       | Role change                   | Health promotion     |
| OMAHA | Role change: impairment                             | Role change                   | Impairment           |
| OMAHA | Role change: potential impairment                   | Role change                   | Potential impairment |
| OMAHA | Sanitation: deficit                                 | Sanitation                    | Deficit              |
| OMAHA | Sanitation: health promotion                        | Sanitation                    | Health promotion     |
| OMAHA | Sanitation: potential deficit                       | Sanitation                    | Potential deficit    |
| OMAHA | Sleep and rest patterns: health promotion           | Sleep and rest patterns       | Health promotion     |
| OMAHA | Sleep and rest patterns: impairment                 | Sleep and rest patterns       | Impairment           |
| OMAHA | Sleep and rest patterns: potential impairment       | Sleep and rest patterns       | Potential impairment |
| OMAHA | Social contact: health promotion                    | Social contact                | Health promotion     |
| OMAHA | Social contact: impairment                          | Social contact                | Impairment           |
| OMAHA | Social contact: potential impairment                | Social contact                | Potential impairment |
| OMAHA | Speech and language: health promotion               | Speech and language           | Health promotion     |
| OMAHA | Speech and language: impairment                     | Speech and language           | Impairment           |
| OMAHA | Speech and language: potential impairment           | Speech and language           | Potential impairment |
| OMAHA | Spiritual distress: actual                          | Spiritual state               | Distress             |
| OMAHA | Spiritual distress: health promotion                | Spiritual state               | Health promotion     |
| OMAHA | Spiritual distress: potential                       | Spiritual state               | Potential distress   |
| OMAHA | Substance use: actual                               | Substance use                 | Actual               |
| OMAHA | Substance use: health promotion                     | Substance use                 | Health promotion     |
| OMAHA | Substance use: potential                            | Substance use                 | Potential            |
| OMAHA | Technical procedure: health promotion               | Technical procedure           | Health promotion     |
| OMAHA | Technical procedure: impairment                     | Technical procedure           | Impairment           |
| OMAHA | Technical procedure: potential impairment           | Technical procedure           | Potential impairment |
| OMAHA | Vision: health promotion                            | Vision                        | Health promotion     |
| OMAHA | Vision: impairment                                  | Vision                        | Impairment           |
| OMAHA | Vision: potential impairment                        | Vision                        | Potential impairment |
